# Supplementary material for: Upstream Transcription Factor 1 (USF1) allelic variants regulate lipoprotein metabolism in women and USF1 expression in atherosclerotic plaque
Source: PubMed Central journal article supplement (PMC3983598; doi:10.1038/srep04650), 2014-04-11
Supplement: srep04650-s1.pdf [file srep04650-s1.pdf]

**Upstream Transcription Factor 1 (*USF1*) allelic variants regulate lipoprotein  
metabolism in women and *USF1* expression in atherosclerotic plaque**

Yue-Mei Fan<sup>1</sup>, Jussi Hernesniemi<sup>1</sup>, Niku Oksala<sup>1,9</sup>, Mari Levula<sup>1</sup>, Emma Raitoharju<sup>1</sup>, Auni Collings<sup>1</sup>, Nina Hutri-Kähönen<sup>2</sup>, Markus Juonala<sup>3</sup>, Jukka Marniemi<sup>4</sup>, Leo-Pekka Lyytikäinen<sup>1</sup>, Ilkka Seppälä<sup>1</sup>, Ari Mennander<sup>5</sup>, Matti Tarkka<sup>5</sup>, Antti J. Kangas<sup>6,7</sup>, Pasi Soininen<sup>6,7</sup>, Juha Pekka Salenius<sup>9</sup>, Norman Klopp<sup>10</sup>, Thomas Illig<sup>10</sup>, Tomi Laitinen<sup>11</sup>, Mika Ala-Korpela<sup>6,7,8,12</sup>, Reijo Laaksonen<sup>1</sup>, Jorma Viikari<sup>13</sup>, Mika Kähönen<sup>14</sup>, Olli T. Raitakari<sup>15</sup>, Terho Lehtimäki<sup>1</sup>

Supplementary Table 1. Characteristics of the Tampere Vascular Study subjects

| Variable                           | Case        | Control    |
|------------------------------------|-------------|------------|
| No. of subjects                    | 68          | 23         |
| Age, years                         | 69.7 ± 10.4 | 67.7 ± 9.4 |
| Body mass index, kg/m <sup>2</sup> | 26.2 ± 3.9  | 28.7 ± 5.3 |
| Systolic blood pressure, mm Hg     | 150 ± 31    | 140 ± 16   |
| Diastolic blood pressure, mm Hg    | 83 ± 15     | 77 ± 10    |
| Ever smoker, %                     | 77.3        | 63.6       |
| Male, %                            | 67.6        | 87.0       |
| Hypercholesterolemia, %            | 69.7        | 91.3       |
| Hypertension, %                    | 83.6        | 100        |
| Diabetes, %                        | 23.5        | 34.8       |

Values are mean ± SD or percentage of subjects. All comparisons (*t* test or  $\chi^2$  test when appropriate) between atherosclerotic lesions (Cases) and histological normal artery (Controls) *P*>0.05, except for BMI.

Supplementary Table 2. The association of *USF1* polymorphisms and the lipid parameters in 2001 according to gender (The Cardiovascular Risk in Young Finns Study)

| SNP no.                           | Genotype | N (women) | Mean ± SD   | P            | N (men) | Mean ± SD   | P     | N (all) | Mean ± SD   | P     |
|-----------------------------------|----------|-----------|-------------|--------------|---------|-------------|-------|---------|-------------|-------|
| <b>Total cholesterol (mmol/L)</b> |          |           |             |              |         |             |       |         |             |       |
| rs3737787                         | GG       | 376       | 5.05 ± 0.92 | 0.732        | 271     | 5.21 ± 1.03 | 0.737 | 647     | 5.12 ± 0.97 | 0.994 |
|                                   | GA       | 407       | 5.04 ± 0.83 |              | 324     | 5.23 ± 0.94 |       | 731     | 5.12 ± 0.88 |       |
|                                   | AA       | 107       | 4.98 ± 0.88 |              | 89      | 5.30 ± 0.97 |       | 196     | 5.12 ± 0.93 |       |
| rs2516838                         | CC       | 462       | 5.05 ± 0.86 | 0.655        | 358     | 5.22 ± 0.96 | 0.926 | 820     | 5.12 ± 0.91 | 0.956 |
|                                   | CG       | 348       | 5.00 ± 0.87 |              | 279     | 5.25 ± 1.00 |       | 627     | 5.11 ± 0.94 |       |
|                                   | GG       | 67        | 5.07 ± 0.90 |              | 41      | 5.22 ± 1.05 |       | 108     | 5.13 ± 0.96 |       |
| rs10908821                        | CC       | 663       | 5.05 ± 0.88 | 0.373        | 522     | 5.25 ± 0.99 | 0.07  | 1185    | 5.14 ± 0.93 | 0.22  |
|                                   | CG       | 207       | 5.00 ± 0.85 |              | 163     | 5.10 ± 0.91 |       | 370     | 5.04 ± 0.88 |       |
|                                   | GG       | 15        | 4.76 ± 0.84 |              | 15      | 5.62 ± 1.25 |       | 30      | 5.19 ± 1.13 |       |
| rs2516839                         | TT       | 349       | 5.01 ± 0.85 | 0.67         | 282     | 5.27 ± 1.00 | 0.536 | 631     | 5.12 ± 0.93 | 0.82  |
|                                   | TC       | 419       | 5.04 ± 0.89 |              | 326     | 5.18 ± 0.94 |       | 745     | 5.10 ± 0.91 |       |
|                                   | CC       | 123       | 5.09 ± 0.90 |              | 96      | 5.22 ± 1.05 |       | 219     | 5.14 ± 0.97 |       |
| rs1556259                         | AA       | 665       | 5.00 ± 0.86 | <b>0.041</b> | 536     | 5.23 ± 0.99 | 0.848 | 1201    | 5.10 ± 0.93 | 0.335 |
|                                   | AG       | 218       | 5.10 ± 0.90 |              | 150     | 5.18 ± 0.95 |       | 368     | 5.13 ± 0.92 |       |
|                                   | GG       | 12        | 5.57 ± 1.03 |              | 13      | 5.19 ± 0.65 |       | 25      | 5.37 ± 0.86 |       |
| rs2774276                         | GG       | 517       | 5.05 ± 0.88 | 0.908        | 400     | 5.26 ± 0.96 | 0.226 | 917     | 5.14 ± 0.92 | 0.342 |
|                                   | GC       | 302       | 5.02 ± 0.86 |              | 243     | 5.15 ± 0.94 |       | 545     | 5.08 ± 0.90 |       |
|                                   | CC       | 50        | 5.04 ± 1.03 |              | 40      | 5.36 ± 1.21 |       | 90      | 5.18 ± 1.11 |       |
| <b>LDL cholesterol (mmol/L)</b>   |          |           |             |              |         |             |       |         |             |       |
| rs3737787                         | GG       | 376       | 3.15 ± 0.79 | 0.768        | 271     | 3.42 ± 0.94 | 0.954 | 647     | 3.26 ± 0.86 | 0.992 |
|                                   | GA       | 407       | 3.13 ± 0.71 |              | 324     | 3.42 ± 0.85 |       | 731     | 3.26 ± 0.79 |       |
|                                   | AA       | 107       | 3.09 ± 0.78 |              | 89      | 3.45 ± 0.79 |       | 196     | 3.25 ± 0.80 |       |
| rs2073658                         | CC       | 374       | 3.14 ± 0.79 | 0.991        | 272     | 3.42 ± 0.93 | 0.967 | 646     | 3.26 ± 0.86 | 0.991 |
|                                   | CT       | 407       | 3.12 ± 0.70 |              | 324     | 3.43 ± 0.85 |       | 731     | 3.26 ± 0.78 |       |
|                                   | TT       | 106       | 3.10 ± 0.78 |              | 88      | 3.44 ± 0.79 |       | 194     | 3.25 ± 0.80 |       |

|                                 |    |     |             |       |     |             |              |      |             |       |
|---------------------------------|----|-----|-------------|-------|-----|-------------|--------------|------|-------------|-------|
| rs2516838                       | CC | 462 | 3.15 ± 0.74 | 0.636 | 358 | 3.43 ± 0.84 | 0.953        | 820  | 3.27 ± 0.79 | 0.924 |
|                                 | CG | 348 | 3.10 ± 0.73 |       | 279 | 3.45 ± 0.93 |              | 627  | 3.25 ± 0.85 |       |
|                                 | GG | 67  | 3.15 ± 0.87 |       | 41  | 3.42 ± 0.87 |              | 108  | 3.25 ± 0.87 |       |
| rs10908821                      | CC | 663 | 3.14 ± 0.77 | 0.612 | 522 | 3.44 ± 0.89 | <b>0.047</b> | 1185 | 3.27 ± 0.84 | 0.105 |
|                                 | CG | 207 | 3.09 ± 0.70 |       | 163 | 3.32 ± 0.80 |              | 370  | 3.19 ± 0.75 |       |
|                                 | GG | 15  | 3.04 ± 0.72 |       | 15  | 3.86 ± 1.09 |              | 30   | 3.45 ± 1.00 |       |
| rs2774279                       | CC | 477 | 3.14 ± 0.73 | 0.612 | 369 | 3.41 ± 0.84 | 0.92         | 846  | 3.26 ± 0.79 | 0.979 |
|                                 | CT | 356 | 3.10 ± 0.75 |       | 293 | 3.43 ± 0.93 |              | 649  | 3.25 ± 0.85 |       |
|                                 | TT | 67  | 3.18 ± 0.85 |       | 42  | 3.40 ± 0.89 |              | 109  | 3.27 ± 0.87 |       |
| rs2774276                       | GG | 517 | 3.13 ± 0.77 | 0.977 | 400 | 3.44 ± 0.86 | 0.174        | 917  | 3.27 ± 0.83 | 0.493 |
|                                 | GC | 302 | 3.13 ± 0.71 |       | 243 | 3.35 ± 0.83 |              | 545  | 3.23 ± 0.78 |       |
|                                 | CC | 50  | 3.11 ± 0.83 |       | 40  | 3.60 ± 1.06 |              | 90   | 3.33 ± 0.97 |       |
| <b>HDL cholesterol (mmol/L)</b> |    |     |             |       |     |             |              |      |             |       |
| rs3737787                       | GG | 376 | 1.40 ± 0.30 | 0.26  | 271 | 1.16 ± 0.26 | 0.593        | 647  | 1.30 ± 0.30 | 0.745 |
|                                 | GA | 407 | 1.41 ± 0.31 |       | 324 | 1.16 ± 0.27 |              | 731  | 1.30 ± 0.32 |       |
|                                 | AA | 107 | 1.36 ± 0.28 |       | 89  | 1.19 ± 0.29 |              | 196  | 1.28 ± 0.29 |       |
| rs2516838                       | CC | 462 | 1.39 ± 0.31 | 0.33  | 358 | 1.16 ± 0.27 | 0.741        | 820  | 1.29 ± 0.31 | 0.137 |
|                                 | CG | 348 | 1.39 ± 0.28 |       | 279 | 1.16 ± 0.26 |              | 627  | 1.29 ± 0.29 |       |
|                                 | GG | 67  | 1.45 ± 0.33 |       | 41  | 1.19 ± 0.31 |              | 108  | 1.35 ± 0.34 |       |
| rs10908821                      | CC | 663 | 1.41 ± 0.30 | 0.059 | 522 | 1.16 ± 0.27 | 0.726        | 1185 | 1.30 ± 0.31 | 0.092 |
|                                 | CG | 207 | 1.38 ± 0.30 |       | 163 | 1.18 ± 0.25 |              | 370  | 1.29 ± 0.30 |       |
|                                 | GG | 15  | 1.23 ± 0.26 |       | 15  | 1.12 ± 0.27 |              | 30   | 1.18 ± 0.26 |       |
| rs2516839                       | TT | 349 | 1.40 ± 0.30 | 0.852 | 282 | 1.18 ± 0.28 | 0.531        | 631  | 1.30 ± 0.31 | 0.684 |
|                                 | TC | 419 | 1.39 ± 0.30 |       | 326 | 1.16 ± 0.26 |              | 745  | 1.29 ± 0.30 |       |
|                                 | CC | 123 | 1.39 ± 0.32 |       | 96  | 1.16 ± 0.25 |              | 219  | 1.29 ± 0.31 |       |
| rs1556259                       | AA | 665 | 1.39 ± 0.30 | 0.659 | 536 | 1.17 ± 0.26 | 0.346        | 1201 | 1.29 ± 0.30 | 0.338 |
|                                 | AG | 218 | 1.41 ± 0.31 |       | 150 | 1.17 ± 0.27 |              | 368  | 1.31 ± 0.32 |       |
|                                 | GG | 12  | 1.42 ± 0.32 |       | 13  | 1.06 ± 0.20 |              | 25   | 1.23 ± 0.31 |       |
| rs2774276                       | GG | 517 | 1.41 ± 0.30 | 0.294 | 400 | 1.17 ± 0.27 | 0.947        | 917  | 1.31 ± 0.31 | 0.338 |
|                                 | GC | 302 | 1.38 ± 0.28 |       | 243 | 1.17 ± 0.25 |              | 545  | 1.28 ± 0.29 |       |
|                                 | CC | 50  | 1.38 ± 0.37 |       | 40  | 1.17 ± 0.24 |              | 90   | 1.29 ± 0.34 |       |

| <b>Triglycerides (mmol/L)</b> |    |     |             |       |     |             |       |      |             |       |
|-------------------------------|----|-----|-------------|-------|-----|-------------|-------|------|-------------|-------|
| rs3737787                     | GG | 376 | 1.14 ± 0.54 | 0.516 | 271 | 1.40 ± 0.73 | 0.777 | 647  | 1.25 ± 0.64 | 0.499 |
|                               | GA | 407 | 1.12 ± 0.49 |       | 324 | 1.43 ± 0.80 |       | 731  | 1.26 ± 0.66 |       |
|                               | AA | 107 | 1.19 ± 0.67 |       | 89  | 1.47 ± 1.17 |       | 196  | 1.31 ± 0.94 |       |
| rs2516838                     | CC | 462 | 1.14 ± 0.55 | 0.691 | 358 | 1.41 ± 0.91 | 0.774 | 820  | 1.26 ± 0.74 | 0.478 |
|                               | CG | 348 | 1.14 ± 0.53 |       | 279 | 1.45 ± 0.73 |       | 627  | 1.27 ± 0.64 |       |
|                               | GG | 67  | 1.08 ± 0.51 |       | 41  | 1.36 ± 0.87 |       | 108  | 1.19 ± 0.68 |       |
| rs10908821                    | CC | 663 | 1.12 ± 0.52 | 0.425 | 522 | 1.44 ± 0.88 | 0.458 | 1185 | 1.26 ± 0.72 | 0.967 |
|                               | CG | 207 | 1.17 ± 0.58 |       | 163 | 1.35 ± 0.63 |       | 370  | 1.25 ± 0.61 |       |
|                               | GG | 15  | 1.10 ± 0.56 |       | 15  | 1.44 ± 0.59 |       | 30   | 1.27 ± 0.59 |       |
| rs2516839                     | TT | 349 | 1.12 ± 0.56 | 0.832 | 282 | 1.43 ± 0.91 | 0.598 | 631  | 1.26 ± 0.75 | 0.886 |
|                               | TC | 419 | 1.13 ± 0.51 |       | 326 | 1.43 ± 0.79 |       | 745  | 1.26 ± 0.66 |       |
|                               | CC | 123 | 1.16 ± 0.56 |       | 96  | 1.34 ± 0.67 |       | 219  | 1.24 ± 0.61 |       |
| rs1556259                     | AA | 665 | 1.14 ± 0.55 | 0.583 | 536 | 1.42 ± 0.82 | 0.934 | 1201 | 1.26 ± 0.70 | 0.94  |
|                               | AG | 218 | 1.13 ± 0.50 |       | 150 | 1.42 ± 0.82 |       | 368  | 1.25 ± 0.66 |       |
|                               | GG | 12  | 0.98 ± 0.35 |       | 13  | 1.50 ± 1.14 |       | 25   | 1.25 ± 0.88 |       |
| rs2774276                     | GG | 517 | 1.12 ± 0.53 | 0.391 | 400 | 1.45 ± 0.91 | 0.596 | 917  | 1.26 ± 0.74 | 0.957 |
|                               | GC | 302 | 1.13 ± 0.54 |       | 243 | 1.40 ± 0.72 |       | 545  | 1.25 ± 0.64 |       |
|                               | CC | 50  | 1.23 ± 0.58 |       | 40  | 1.33 ± 0.54 |       | 90   | 1.27 ± 0.56 |       |
| <b>Apolipoprotein B (g/L)</b> |    |     |             |       |     |             |       |      |             |       |
| rs3737787                     | GG | 376 | 1.00 ± 0.23 | 0.659 | 271 | 1.12 ± 0.27 | 0.952 | 647  | 1.05 ± 0.26 | 0.942 |
|                               | GA | 407 | 0.98 ± 0.22 |       | 324 | 1.12 ± 0.25 |       | 731  | 1.04 ± 0.24 |       |
|                               | AA | 107 | 0.99 ± 0.24 |       | 89  | 1.13 ± 0.26 |       | 196  | 1.05 ± 0.26 |       |
| rs2516838                     | CC | 462 | 0.99 ± 0.23 | 0.902 | 358 | 1.12 ± 0.25 | 0.843 | 820  | 1.05 ± 0.25 | 0.817 |
|                               | CG | 348 | 0.98 ± 0.23 |       | 279 | 1.13 ± 0.25 |       | 627  | 1.05 ± 0.25 |       |
|                               | GG | 67  | 0.98 ± 0.25 |       | 41  | 1.11 ± 0.31 |       | 108  | 1.03 ± 0.28 |       |
| rs10908821                    | CC | 663 | 0.99 ± 0.23 | 0.947 | 522 | 1.12 ± 0.26 | 0.129 | 1185 | 1.05 ± 0.25 | 0.303 |
|                               | CG | 207 | 0.98 ± 0.22 |       | 163 | 1.09 ± 0.24 |       | 370  | 1.03 ± 0.23 |       |
|                               | GG | 15  | 0.97 ± 0.23 |       | 15  | 1.20 ± 0.34 |       | 30   | 1.09 ± 0.31 |       |
| rs2516839                     | TT | 349 | 0.97 ± 0.23 | 0.469 | 282 | 1.12 ± 0.26 | 0.924 | 631  | 1.04 ± 0.26 | 0.886 |
|                               | TC | 419 | 0.99 ± 0.23 |       | 326 | 1.12 ± 0.24 |       | 745  | 1.05 ± 0.24 |       |

|           |    |     |                 |       |     |                 |       |      |                 |       |
|-----------|----|-----|-----------------|-------|-----|-----------------|-------|------|-----------------|-------|
|           | CC | 123 | $1.00 \pm 0.23$ |       | 96  | $1.11 \pm 0.27$ |       | 219  | $1.05 \pm 0.25$ |       |
| rs1556259 | AA | 665 | $0.98 \pm 0.23$ | 0.309 | 536 | $1.12 \pm 0.26$ | 0.804 | 1201 | $1.04 \pm 0.25$ | 0.352 |
|           | AG | 218 | $0.99 \pm 0.24$ |       | 150 | $1.11 \pm 0.24$ |       | 368  | $1.04 \pm 0.25$ |       |
|           | GG | 12  | $1.08 \pm 0.25$ |       | 13  | $1.15 \pm 0.21$ |       | 25   | $1.11 \pm 0.23$ |       |
| rs2774276 | GG | 517 | $0.98 \pm 0.24$ | 0.767 | 400 | $1.12 \pm 0.26$ | 0.601 | 917  | $1.04 \pm 0.26$ | 0.866 |
|           | GC | 302 | $0.99 \pm 0.22$ |       | 243 | $1.11 \pm 0.25$ |       | 545  | $1.04 \pm 0.24$ |       |
|           | CC | 50  | $0.99 \pm 0.26$ |       | 40  | $1.14 \pm 0.30$ |       | 90   | $1.06 \pm 0.29$ |       |

Supplementary Table 3. The association of *USF1* haplotypes and lipid parameters in 2001 according to gender (The Cardiovascular Risk in Young Finns Study)

| Haplotype no.                     | copy | N (women) | Mean $\pm$ SD   | P            | N (men) | Mean $\pm$ SD   | P            | N (all) | Mean $\pm$ SD   | P     |
|-----------------------------------|------|-----------|-----------------|--------------|---------|-----------------|--------------|---------|-----------------|-------|
| <b>Total cholesterol (mmol/L)</b> |      |           |                 |              |         |                 |              |         |                 |       |
| H1                                | 0    | 386       | 5.05 $\pm$ 0.92 | 0.62         | 283     | 5.21 $\pm$ 1.01 | 0.854        | 669     | 5.12 $\pm$ 0.96 | 0.977 |
|                                   | 1    | 409       | 5.04 $\pm$ 0.82 |              | 333     | 5.22 $\pm$ 0.94 |              | 742     | 5.12 $\pm$ 0.88 |       |
|                                   | 2    | 107       | 4.96 $\pm$ 0.87 |              | 90      | 5.27 $\pm$ 1.00 |              | 197     | 5.10 $\pm$ 0.94 |       |
| H2                                | 0    | 490       | 5.05 $\pm$ 0.88 | 0.434        | 380     | 5.20 $\pm$ 0.96 | 0.857        | 870     | 5.12 $\pm$ 0.92 | 0.868 |
|                                   | 1    | 346       | 4.99 $\pm$ 0.86 |              | 286     | 5.24 $\pm$ 0.99 |              | 632     | 5.11 $\pm$ 0.93 |       |
|                                   | 2    | 66        | 5.12 $\pm$ 0.89 |              | 40      | 5.22 $\pm$ 1.06 |              | 106     | 5.16 $\pm$ 0.96 |       |
| H3                                | 0    | 670       | 5.00 $\pm$ 0.86 | <b>0.047</b> | 543     | 5.23 $\pm$ 0.99 | 0.882        | 1213    | 5.10 $\pm$ 0.93 | 0.328 |
|                                   | 1    | 217       | 5.11 $\pm$ 0.90 |              | 148     | 5.18 $\pm$ 0.96 |              | 365     | 5.14 $\pm$ 0.92 |       |
|                                   | 2    | 15        | 5.47 $\pm$ 0.97 |              | 15      | 5.22 $\pm$ 0.62 |              | 30      | 5.34 $\pm$ 0.81 |       |
| H4                                | 0    | 681       | 5.06 $\pm$ 0.88 | 0.212        | 530     | 5.25 $\pm$ 0.98 | 0.067        | 1211    | 5.14 $\pm$ 0.93 | 0.123 |
|                                   | 1    | 207       | 4.98 $\pm$ 0.84 |              | 161     | 5.10 $\pm$ 0.92 |              | 368     | 5.03 $\pm$ 0.88 |       |
|                                   | 2    | 14        | 4.73 $\pm$ 0.86 |              | 15      | 5.62 $\pm$ 1.25 |              | 29      | 5.19 $\pm$ 1.15 |       |
| H5                                | 0    | 727       | 5.02 $\pm$ 0.87 | 0.263        | 568     | 5.22 $\pm$ 0.95 | 0.842        | 1295    | 5.11 $\pm$ 0.91 | 0.605 |
|                                   | 1    | 165       | 5.07 $\pm$ 0.86 |              | 135     | 5.23 $\pm$ 1.07 |              | 300     | 5.14 $\pm$ 0.96 |       |
|                                   | 2    | 10        | 5.44 $\pm$ 1.22 |              | 3       | 4.90 $\pm$ 1.00 |              | 13      | 5.32 $\pm$ 1.16 |       |
| <b>LDL cholesterol (mmol/L)</b>   |      |           |                 |              |         |                 |              |         |                 |       |
| H1                                | 0    | 386       | 3.15 $\pm$ 0.79 | 0.639        | 283     | 3.42 $\pm$ 0.93 | 0.983        | 669     | 3.26 $\pm$ 0.86 | 0.931 |
|                                   | 1    | 409       | 3.12 $\pm$ 0.70 |              | 333     | 3.41 $\pm$ 0.85 |              | 742     | 3.26 $\pm$ 0.79 |       |
|                                   | 2    | 107       | 3.08 $\pm$ 0.77 |              | 90      | 3.43 $\pm$ 0.82 |              | 197     | 3.24 $\pm$ 0.81 |       |
| H2                                | 0    | 490       | 3.15 $\pm$ 0.74 | 0.482        | 380     | 3.41 $\pm$ 0.84 | 0.917        | 870     | 3.26 $\pm$ 0.80 | 0.938 |
|                                   | 1    | 346       | 3.10 $\pm$ 0.73 |              | 286     | 3.43 $\pm$ 0.93 |              | 632     | 3.25 $\pm$ 0.84 |       |
|                                   | 2    | 66        | 3.19 $\pm$ 0.86 |              | 40      | 3.41 $\pm$ 0.88 |              | 106     | 3.27 $\pm$ 0.87 |       |
| H3                                | 0    | 670       | 3.10 $\pm$ 0.73 | <b>0.015</b> | 543     | 3.43 $\pm$ 0.87 | 0.716        | 1213    | 3.25 $\pm$ 0.82 | 0.114 |
|                                   | 1    | 217       | 3.19 $\pm$ 0.77 |              | 148     | 3.37 $\pm$ 0.90 |              | 365     | 3.26 $\pm$ 0.83 |       |
|                                   | 2    | 15        | 3.61 $\pm$ 0.85 |              | 15      | 3.51 $\pm$ 0.75 |              | 30      | 3.56 $\pm$ 0.79 |       |
| H4                                | 0    | 681       | 3.15 $\pm$ 0.77 | 0.402        | 530     | 3.44 $\pm$ 0.89 | <b>0.043</b> | 1211    | 3.28 $\pm$ 0.83 | 0.072 |
|                                   | 1    | 207       | 3.08 $\pm$ 0.69 |              | 161     | 3.32 $\pm$ 0.80 |              | 368     | 3.18 $\pm$ 0.75 |       |
|                                   | 2    | 14        | 3.01 $\pm$ 0.74 |              | 15      | 3.86 $\pm$ 1.09 |              | 29      | 3.45 $\pm$ 1.02 |       |
| H5                                | 0    | 727       | 3.12 $\pm$ 0.75 | 0.45         | 568     | 3.41 $\pm$ 0.86 | 0.855        | 1295    | 3.25 $\pm$ 0.81 | 0.21  |
|                                   | 1    | 165       | 3.16 $\pm$ 0.72 |              | 135     | 3.44 $\pm$ 0.95 |              | 300     | 3.29 $\pm$ 0.84 |       |

|                                 |   |     |             |       |     |             |       |      |             |       |
|---------------------------------|---|-----|-------------|-------|-----|-------------|-------|------|-------------|-------|
|                                 | 2 | 10  | 3.40 ± 0.89 |       | 3   | 3.20 ± 1.08 |       | 13   | 3.35 ± 0.89 |       |
| <b>HDL cholesterol (mmol/L)</b> |   |     |             |       |     |             |       |      |             |       |
| H1                              | 0 | 386 | 1.39 ± 0.30 | 0.22  | 283 | 1.16 ± 0.25 | 0.846 | 669  | 1.30 ± 0.30 | 0.59  |
|                                 | 1 | 409 | 1.41 ± 0.31 |       | 333 | 1.17 ± 0.27 |       | 742  | 1.30 ± 0.30 |       |
|                                 | 2 | 107 | 1.35 ± 0.28 |       | 90  | 1.18 ± 0.28 |       | 197  | 1.28 ± 0.29 |       |
| H2                              | 0 | 490 | 1.39 ± 0.31 | 0.31  | 380 | 1.16 ± 0.27 | 0.753 | 870  | 1.29 ± 0.31 | 0.116 |
|                                 | 1 | 346 | 1.39 ± 0.28 |       | 286 | 1.17 ± 0.26 |       | 632  | 1.29 ± 0.29 |       |
|                                 | 2 | 66  | 1.45 ± 0.33 |       | 40  | 1.20 ± 0.31 |       | 106  | 1.36 ± 0.34 |       |
| H3                              | 0 | 670 | 1.39 ± 0.30 | 0.674 | 543 | 1.17 ± 0.26 | 0.23  | 1213 | 1.29 ± 0.30 | 0.285 |
|                                 | 1 | 217 | 1.41 ± 0.31 |       | 148 | 1.17 ± 0.28 |       | 365  | 1.31 ± 0.32 |       |
|                                 | 2 | 15  | 1.41 ± 0.29 |       | 15  | 1.05 ± 0.18 |       | 30   | 1.23 ± 0.30 |       |
| H4                              | 0 | 681 | 1.40 ± 0.30 | 0.111 | 530 | 1.17 ± 0.27 | 0.731 | 1211 | 1.30 ± 0.31 | 0.135 |
|                                 | 1 | 207 | 1.38 ± 0.30 |       | 161 | 1.18 ± 0.25 |       | 368  | 1.29 ± 0.30 |       |
|                                 | 2 | 14  | 1.26 ± 0.24 |       | 15  | 1.12 ± 0.27 |       | 29   | 1.19 ± 0.26 |       |
| H5                              | 0 | 727 | 1.39 ± 0.30 | 0.571 | 568 | 1.17 ± 0.27 | 0.67  | 1295 | 1.30 ± 0.31 | 0.19  |
|                                 | 1 | 165 | 1.40 ± 0.31 |       | 135 | 1.16 ± 0.25 |       | 300  | 1.29 ± 0.31 |       |
|                                 | 2 | 10  | 1.50 ± 0.39 |       | 3   | 1.29 ± 0.24 |       | 13   | 1.45 ± 0.36 |       |
| <b>Triglycerides (mmol/L)</b>   |   |     |             |       |     |             |       |      |             |       |
| H1                              | 0 | 386 | 1.13 ± 0.54 | 0.59  | 283 | 1.39 ± 0.72 | 0.756 | 669  | 1.24 ± 0.64 | 0.515 |
|                                 | 1 | 409 | 1.12 ± 0.49 |       | 333 | 1.43 ± 0.79 |       | 742  | 1.26 ± 0.66 |       |
|                                 | 2 | 107 | 1.18 ± 0.67 |       | 90  | 1.46 ± 1.17 |       | 197  | 1.31 ± 0.94 |       |
| H2                              | 0 | 490 | 1.14 ± 0.56 | 0.581 | 380 | 1.41 ± 0.89 | 0.784 | 870  | 1.26 ± 0.73 | 0.456 |
|                                 | 1 | 346 | 1.13 ± 0.51 |       | 286 | 1.44 ± 0.73 |       | 632  | 1.27 ± 0.63 |       |
|                                 | 2 | 66  | 1.07 ± 0.52 |       | 40  | 1.36 ± 0.88 |       | 106  | 1.18 ± 0.68 |       |
| H3                              | 0 | 670 | 1.14 ± 0.55 | 0.594 | 543 | 1.41 ± 0.81 | 0.875 | 1213 | 1.26 ± 0.69 | 0.98  |
|                                 | 1 | 217 | 1.13 ± 0.50 |       | 148 | 1.45 ± 0.85 |       | 365  | 1.26 ± 0.68 |       |
|                                 | 2 | 15  | 0.99 ± 0.32 |       | 15  | 1.47 ± 1.06 |       | 30   | 1.23 ± 0.81 |       |
| H4                              | 0 | 681 | 1.12 ± 0.52 | 0.487 | 530 | 1.44 ± 0.88 | 0.507 | 1211 | 1.26 ± 0.72 | 0.938 |
|                                 | 1 | 207 | 1.17 ± 0.59 |       | 161 | 1.35 ± 0.64 |       | 368  | 1.25 ± 0.62 |       |
|                                 | 2 | 14  | 1.04 ± 0.52 |       | 15  | 1.44 ± 0.59 |       | 29   | 1.25 ± 0.59 |       |
| H5                              | 0 | 727 | 1.13 ± 0.54 | 0.702 | 568 | 1.42 ± 0.84 | 0.583 | 1295 | 1.26 ± 0.71 | 0.824 |
|                                 | 1 | 165 | 1.16 ± 0.52 |       | 135 | 1.41 ± 0.74 |       | 300  | 1.27 ± 0.64 |       |
|                                 | 2 | 10  | 1.22 ± 0.45 |       | 3   | 0.93 ± 0.38 |       | 13   | 1.15 ± 0.44 |       |
| <b>Apolipoprotein B (g/L)</b>   |   |     |             |       |     |             |       |      |             |       |



|    |   |     |                 |       |     |                 |       |      |                 |       |
|----|---|-----|-----------------|-------|-----|-----------------|-------|------|-----------------|-------|
| H1 | 0 | 386 | $1.00 \pm 0.23$ | 0.544 | 283 | $1.11 \pm 0.26$ | 0.982 | 669  | $1.05 \pm 0.25$ | 0.925 |
|    | 1 | 409 | $0.98 \pm 0.22$ |       | 333 | $1.12 \pm 0.25$ |       | 742  | $1.04 \pm 0.24$ |       |
|    | 2 | 107 | $0.98 \pm 0.24$ |       | 90  | $1.12 \pm 0.26$ |       | 197  | $1.04 \pm 0.26$ |       |
| H2 | 0 | 490 | $0.99 \pm 0.23$ | 0.831 | 380 | $1.11 \pm 0.25$ | 0.874 | 870  | $1.04 \pm 0.25$ | 0.909 |
|    | 1 | 346 | $0.98 \pm 0.22$ |       | 286 | $1.12 \pm 0.25$ |       | 632  | $1.05 \pm 0.25$ |       |
|    | 2 | 66  | $0.99 \pm 0.25$ |       | 40  | $1.11 \pm 0.31$ |       | 106  | $1.03 \pm 0.28$ |       |
| H3 | 0 | 670 | $0.98 \pm 0.23$ | 0.33  | 543 | $1.12 \pm 0.26$ | 0.781 | 1213 | $1.04 \pm 0.25$ | 0.36  |
|    | 1 | 217 | $1.00 \pm 0.24$ |       | 148 | $1.11 \pm 0.25$ |       | 365  | $1.04 \pm 0.25$ |       |
|    | 2 | 15  | $1.06 \pm 0.23$ |       | 15  | $1.16 \pm 0.20$ |       | 30   | $1.11 \pm 0.22$ |       |
| H4 | 0 | 681 | $0.99 \pm 0.23$ | 0.687 | 530 | $1.12 \pm 0.26$ | 0.138 | 1211 | $1.05 \pm 0.25$ | 0.293 |
|    | 1 | 207 | $0.98 \pm 0.22$ |       | 161 | $1.09 \pm 0.24$ |       | 368  | $1.03 \pm 0.23$ |       |
|    | 2 | 14  | $0.95 \pm 0.22$ |       | 15  | $1.20 \pm 0.34$ |       | 29   | $1.08 \pm 0.31$ |       |
| H5 | 0 | 727 | $0.98 \pm 0.23$ | 0.316 | 568 | $1.12 \pm 0.25$ | 0.751 | 1295 | $1.04 \pm 0.25$ | 0.567 |
|    | 1 | 165 | $1.00 \pm 0.23$ |       | 135 | $1.12 \pm 0.26$ |       | 300  | $1.06 \pm 0.25$ |       |
|    | 2 | 10  | $1.06 \pm 0.25$ |       | 3   | $1.01 \pm 0.30$ |       | 13   | $1.05 \pm 0.25$ |       |

Supplementary Table 4. The association of *USF1* polymorphisms and the lipid parameters in 2007 according to gender (The Cardiovascular Risk in Young Finns Study)

| SNP no.                           | Genotype | N (women) | Mean ± SD   | P            | N (men) | Mean ± SD   | P     | N (all) | Mean ± SD   | P     |
|-----------------------------------|----------|-----------|-------------|--------------|---------|-------------|-------|---------|-------------|-------|
| <b>Total cholesterol (mmol/L)</b> |          |           |             |              |         |             |       |         |             |       |
| rs3737787                         | GG       | 376       | 4.96 ± 0.82 | <b>0.039</b> | 271     | 5.14 ± 0.91 | 0.248 | 647     | 5.03 ± 0.86 | 0.701 |
|                                   | GA       | 407       | 4.89 ± 0.81 |              | 324     | 5.13 ± 0.90 |       | 731     | 5.00 ± 0.86 |       |
|                                   | AA       | 107       | 4.73 ± 0.77 |              | 89      | 5.31 ± 0.87 |       | 196     | 4.99 ± 0.86 |       |
| rs2516838                         | CC       | 462       | 4.94 ± 0.83 | 0.281        | 358     | 5.18 ± 0.90 | 0.576 | 820     | 5.05 ± 0.87 | 0.069 |
|                                   | CG       | 348       | 4.82 ± 0.75 |              | 279     | 5.12 ± 0.90 |       | 627     | 4.96 ± 0.83 |       |
|                                   | GG       | 67        | 5.02 ± 0.86 |              | 41      | 5.26 ± 0.99 |       | 108     | 5.11 ± 0.92 |       |
| rs10908821                        | CC       | 663       | 4.89 ± 0.80 | 0.476        | 522     | 5.15 ± 0.89 | 0.956 | 1185    | 5.00 ± 0.85 | 0.67  |
|                                   | CG       | 207       | 4.92 ± 0.84 |              | 163     | 5.17 ± 0.95 |       | 370     | 5.03 ± 0.90 |       |
|                                   | GG       | 15        | 4.67 ± 0.69 |              | 15      | 5.14 ± 0.91 |       | 30      | 4.90 ± 0.83 |       |
| rs2516839                         | TT       | 349       | 4.81 ± 0.80 | <b>0.013</b> | 282     | 5.20 ± 0.91 | 0.392 | 631     | 4.98 ± 0.87 | 0.254 |
|                                   | TC       | 419       | 4.93 ± 0.79 |              | 326     | 5.10 ± 0.89 |       | 745     | 5.01 ± 0.84 |       |
|                                   | CC       | 123       | 5.03 ± 0.87 |              | 96      | 5.18 ± 0.90 |       | 219     | 5.10 ± 0.89 |       |
| rs1556259                         | AA       | 665       | 4.85 ± 0.80 | <b>0.009</b> | 536     | 5.16 ± 0.91 | 0.443 | 1201    | 4.99 ± 0.86 | 0.182 |
|                                   | AG       | 218       | 5.02 ± 0.82 |              | 150     | 5.07 ± 0.85 |       | 368     | 5.04 ± 0.83 |       |
|                                   | GG       | 12        | 5.22 ± 0.97 |              | 13      | 5.31 ± 0.55 |       | 25      | 5.26 ± 0.77 |       |
| rs2774276                         | GG       | 517       | 4.87 ± 0.80 | 0.535        | 400     | 5.17 ± 0.89 | 0.889 | 917     | 5.00 ± 0.85 | 0.883 |
|                                   | GC       | 302       | 4.94 ± 0.81 |              | 243     | 5.14 ± 0.93 |       | 545     | 5.03 ± 0.87 |       |
|                                   | CC       | 50        | 4.89 ± 0.87 |              | 40      | 5.16 ± 1.01 |       | 90      | 5.01 ± 0.94 |       |
| <b>LDL cholesterol (mmol/L)</b>   |          |           |             |              |         |             |       |         |             |       |
| rs3737787                         | GG       | 376       | 3.01 ± 0.69 | <b>0.016</b> | 271     | 3.27 ± 0.79 | 0.35  | 647     | 3.12 ± 0.75 | 0.432 |
|                                   | GA       | 407       | 2.91 ± 0.72 |              | 324     | 3.26 ± 0.80 |       | 731     | 3.06 ± 0.78 |       |
|                                   | AA       | 107       | 2.80 ± 0.64 |              | 89      | 3.39 ± 0.75 |       | 196     | 3.07 ± 0.75 |       |
| rs2516838                         | CC       | 462       | 2.98 ± 0.72 | 0.12         | 358     | 3.30 ± 0.79 | 0.668 | 820     | 3.12 ± 0.77 | 0.17  |
|                                   | CG       | 348       | 2.88 ± 0.64 |              | 279     | 3.25 ± 0.80 |       | 627     | 3.05 ± 0.74 |       |
|                                   | GG       | 67        | 3.01 ± 0.81 |              | 41      | 3.32 ± 0.84 |       | 108     | 3.13 ± 0.83 |       |

|                                 |    |     |             |              |     |             |       |      |             |              |
|---------------------------------|----|-----|-------------|--------------|-----|-------------|-------|------|-------------|--------------|
| rs10908821                      | CC | 663 | 2.92 ± 0.70 | 0.744        | 522 | 3.27 ± 0.79 | 0.977 | 1185 | 3.08 ± 0.76 | 0.789        |
|                                 | CG | 207 | 2.96 ± 0.69 |              | 163 | 3.28 ± 0.81 |       | 370  | 3.10 ± 0.76 |              |
|                                 | GG | 15  | 2.94 ± 0.60 |              | 15  | 3.31 ± 0.81 |       | 30   | 3.13 ± 0.73 |              |
| rs2516839                       | TT | 349 | 2.85 ± 0.69 | <b>0.002</b> | 282 | 3.30 ± 0.80 | 0.619 | 631  | 3.05 ± 0.77 | 0.068        |
|                                 | TC | 419 | 2.96 ± 0.69 |              | 326 | 3.24 ± 0.79 |       | 745  | 3.08 ± 0.75 |              |
|                                 | CC | 123 | 3.10 ± 0.73 |              | 96  | 3.31 ± 0.79 |       | 219  | 3.19 ± 0.76 |              |
| rs1556259                       | AA | 665 | 2.89 ± 0.68 | <b>0.003</b> | 536 | 3.27 ± 0.79 | 0.276 | 1201 | 3.06 ± 0.76 | <b>0.026</b> |
|                                 | AG | 218 | 3.05 ± 0.74 |              | 150 | 3.22 ± 0.78 |       | 368  | 3.12 ± 0.76 |              |
|                                 | GG | 12  | 3.30 ± 0.75 |              | 13  | 3.57 ± 0.56 |       | 25   | 3.44 ± 0.66 |              |
| rs2774276                       | GG | 517 | 2.90 ± 0.71 | 0.223        | 400 | 3.28 ± 0.79 | 0.904 | 917  | 3.07 ± 0.77 | 0.631        |
|                                 | GC | 302 | 2.99 ± 0.69 |              | 243 | 3.26 ± 0.80 |       | 545  | 3.11 ± 0.75 |              |
|                                 | CC | 50  | 2.96 ± 0.70 |              | 40  | 3.26 ± 0.86 |       | 90   | 3.09 ± 0.79 |              |
| <b>HDL cholesterol (mmol/L)</b> |    |     |             |              |     |             |       |      |             |              |
| rs3737787                       | GG | 376 | 1.44 ± 0.31 | 0.209        | 271 | 1.23 ± 0.29 | 0.322 | 647  | 1.35 ± 0.32 | 0.806        |
|                                 | GA | 407 | 1.46 ± 0.31 |              | 324 | 1.20 ± 0.28 |       | 731  | 1.35 ± 0.32 |              |
|                                 | AA | 107 | 1.41 ± 0.35 |              | 89  | 1.24 ± 0.25 |       | 196  | 1.33 ± 0.32 |              |
| rs2516838                       | CC | 462 | 1.44 ± 0.32 | 0.1          | 358 | 1.22 ± 0.27 | 0.306 | 820  | 1.35 ± 0.32 | <b>0.016</b> |
|                                 | CG | 348 | 1.43 ± 0.28 |              | 279 | 1.20 ± 0.28 |       | 627  | 1.33 ± 0.30 |              |
|                                 | GG | 67  | 1.52 ± 0.35 |              | 41  | 1.26 ± 0.36 |       | 108  | 1.42 ± 0.38 |              |
| rs10908821                      | CC | 663 | 1.46 ± 0.31 | <b>0.041</b> | 522 | 1.21 ± 0.28 | 0.409 | 1185 | 1.35 ± 0.32 | 0.255        |
|                                 | CG | 207 | 1.43 ± 0.30 |              | 163 | 1.24 ± 0.28 |       | 370  | 1.35 ± 0.32 |              |
|                                 | GG | 15  | 1.27 ± 0.27 |              | 15  | 1.23 ± 0.23 |       | 30   | 1.25 ± 0.24 |              |
| rs2516839                       | TT | 349 | 1.45 ± 0.32 | 0.524        | 282 | 1.21 ± 0.28 | 0.633 | 631  | 1.34 ± 0.33 | 0.904        |
|                                 | TC | 419 | 1.45 ± 0.30 |              | 326 | 1.21 ± 0.28 |       | 745  | 1.35 ± 0.32 |              |
|                                 | CC | 123 | 1.42 ± 0.32 |              | 96  | 1.24 ± 0.27 |       | 219  | 1.34 ± 0.31 |              |
| rs1556259                       | AA | 665 | 1.44 ± 0.31 | 0.429        | 536 | 1.23 ± 0.28 | 0.424 | 1201 | 1.34 ± 0.32 | 0.513        |
|                                 | AG | 218 | 1.47 ± 0.32 |              | 150 | 1.19 ± 0.27 |       | 368  | 1.35 ± 0.32 |              |
|                                 | GG | 12  | 1.38 ± 0.30 |              | 13  | 1.19 ± 0.27 |       | 25   | 1.28 ± 0.29 |              |
| rs2774276                       | GG | 517 | 1.46 ± 0.32 | 0.332        | 400 | 1.21 ± 0.28 | 0.15  | 917  | 1.35 ± 0.33 | 0.838        |
|                                 | GC | 302 | 1.43 ± 0.29 |              | 243 | 1.23 ± 0.29 |       | 545  | 1.34 ± 0.30 |              |
|                                 | CC | 50  | 1.41 ± 0.34 |              | 40  | 1.30 ± 0.27 |       | 90   | 1.36 ± 0.31 |              |

| <b>Triglycerides (mmol/L)</b> |    |     |             |              |     |             |       |      |             |       |
|-------------------------------|----|-----|-------------|--------------|-----|-------------|-------|------|-------------|-------|
| rs3737787                     | GG | 376 | 1.14 ± 0.54 | 0.905        | 271 | 1.43 ± 0.69 | 0.479 | 647  | 1.26 ± 0.62 | 0.418 |
|                               | GA | 407 | 1.14 ± 0.58 |              | 324 | 1.50 ± 0.74 |       | 731  | 1.30 ± 0.67 |       |
|                               | AA | 107 | 1.17 ± 0.56 |              | 89  | 1.49 ± 0.69 |       | 196  | 1.31 ± 0.64 |       |
| rs2516838                     | CC | 462 | 1.16 ± 0.59 | 0.565        | 358 | 1.45 ± 0.70 | 0.599 | 820  | 1.28 ± 0.66 | 0.811 |
|                               | CG | 348 | 1.13 ± 0.53 |              | 279 | 1.50 ± 0.72 |       | 627  | 1.29 ± 0.65 |       |
|                               | GG | 67  | 1.09 ± 0.40 |              | 41  | 1.51 ± 0.76 |       | 108  | 1.25 ± 0.60 |       |
| rs10908821                    | CC | 663 | 1.13 ± 0.53 | 0.339        | 522 | 1.48 ± 0.72 | 0.594 | 1185 | 1.29 ± 0.65 | 0.59  |
|                               | CG | 207 | 1.18 ± 0.65 |              | 163 | 1.44 ± 0.69 |       | 370  | 1.30 ± 0.68 |       |
|                               | GG | 15  | 1.01 ± 0.37 |              | 15  | 1.33 ± 0.47 |       | 30   | 1.17 ± 0.45 |       |
| rs2516839                     | TT | 349 | 1.14 ± 0.51 | 0.953        | 282 | 1.53 ± 0.74 | 0.127 | 631  | 1.31 ± 0.65 | 0.39  |
|                               | TC | 419 | 1.15 ± 0.58 |              | 326 | 1.44 ± 0.70 |       | 745  | 1.27 ± 0.65 |       |
|                               | CC | 123 | 1.15 ± 0.58 |              | 96  | 1.39 ± 0.67 |       | 219  | 1.25 ± 0.63 |       |
| rs1556259                     | AA | 665 | 1.15 ± 0.56 | 0.797        | 536 | 1.47 ± 0.71 | 0.402 | 1201 | 1.29 ± 0.65 | 0.589 |
|                               | AG | 218 | 1.12 ± 0.55 |              | 150 | 1.46 ± 0.73 |       | 368  | 1.26 ± 0.65 |       |
|                               | GG | 12  | 1.20 ± 0.43 |              | 13  | 1.20 ± 0.50 |       | 25   | 1.20 ± 0.46 |       |
| rs2774276                     | GG | 517 | 1.14 ± 0.52 | 0.931        | 400 | 1.50 ± 0.73 | 0.302 | 917  | 1.30 ± 0.65 | 0.715 |
|                               | GC | 302 | 1.15 ± 0.59 |              | 243 | 1.44 ± 0.70 |       | 545  | 1.28 ± 0.66 |       |
|                               | CC | 50  | 1.16 ± 0.60 |              | 40  | 1.35 ± 0.63 |       | 90   | 1.24 ± 0.62 |       |
| <b>Apolipoprotein B (g/L)</b> |    |     |             |              |     |             |       |      |             |       |
| rs3737787                     | GG | 376 | 0.95 ± 0.23 | 0.087        | 271 | 1.09 ± 0.25 | 0.473 | 647  | 1.01 ± 0.25 | 0.846 |
|                               | GA | 407 | 0.93 ± 0.22 |              | 324 | 1.10 ± 0.25 |       | 731  | 1.00 ± 0.25 |       |
|                               | AA | 107 | 0.91 ± 0.20 |              | 89  | 1.12 ± 0.23 |       | 196  | 1.01 ± 0.24 |       |
| rs2516838                     | CC | 462 | 0.95 ± 0.23 | 0.287        | 358 | 1.09 ± 0.24 | 0.795 | 820  | 1.01 ± 0.24 | 0.652 |
|                               | CG | 348 | 0.92 ± 0.21 |              | 279 | 1.10 ± 0.25 |       | 627  | 1.00 ± 0.25 |       |
|                               | GG | 67  | 0.95 ± 0.24 |              | 41  | 1.12 ± 0.28 |       | 108  | 1.01 ± 0.27 |       |
| rs10908821                    | CC | 663 | 0.93 ± 0.22 | 0.521        | 522 | 1.10 ± 0.24 | 0.894 | 1185 | 1.00 ± 0.24 | 0.881 |
|                               | CG | 207 | 0.95 ± 0.24 |              | 163 | 1.09 ± 0.26 |       | 370  | 1.01 ± 0.25 |       |
|                               | GG | 15  | 0.93 ± 0.18 |              | 15  | 1.08 ± 0.27 |       | 30   | 1.01 ± 0.24 |       |
| rs2516839                     | TT | 349 | 0.91 ± 0.22 | <b>0.015</b> | 282 | 1.11 ± 0.25 | 0.222 | 631  | 1.00 ± 0.25 | 0.46  |
|                               | TC | 419 | 0.94 ± 0.22 |              | 326 | 1.08 ± 0.24 |       | 745  | 1.00 ± 0.24 |       |

|           |    |     |                 |              |     |                 |       |      |                 |       |
|-----------|----|-----|-----------------|--------------|-----|-----------------|-------|------|-----------------|-------|
|           | CC | 123 | $0.98 \pm 0.24$ |              | 96  | $1.08 \pm 0.25$ |       | 219  | $1.02 \pm 0.25$ |       |
| rs1556259 | AA | 665 | $0.93 \pm 0.22$ | <b>0.049</b> | 536 | $1.10 \pm 0.25$ | 0.638 | 1201 | $1.00 \pm 0.25$ | 0.388 |
|           | AG | 218 | $0.96 \pm 0.23$ |              | 150 | $1.08 \pm 0.23$ |       | 368  | $1.00 \pm 0.24$ |       |
|           | GG | 12  | $1.05 \pm 0.24$ |              | 13  | $1.09 \pm 0.20$ |       | 25   | $1.07 \pm 0.22$ |       |
| rs2774276 | GG | 517 | $0.93 \pm 0.22$ | 0.283        | 400 | $1.10 \pm 0.25$ | 0.581 | 917  | $1.00 \pm 0.25$ | 0.872 |
|           | GC | 302 | $0.95 \pm 0.23$ |              | 243 | $1.08 \pm 0.25$ |       | 545  | $1.01 \pm 0.25$ |       |
|           | CC | 50  | $0.95 \pm 0.23$ |              | 40  | $1.08 \pm 0.28$ |       | 90   | $1.00 \pm 0.26$ |       |

Supplementary Table 5. The association of *USFI* haplotypes and lipid parameters in 2007 according to gender (The Cardiovascular Risk in Young Finns Study)

| Haplotype no.                     | copy | N (women) | Mean $\pm$ SD   | P            | N (men) | Mean $\pm$ SD   | P     | N (all) | Mean $\pm$ SD   | P            |
|-----------------------------------|------|-----------|-----------------|--------------|---------|-----------------|-------|---------|-----------------|--------------|
| <b>Total cholesterol (mmol/L)</b> |      |           |                 |              |         |                 |       |         |                 |              |
| H1                                | 0    | 386       | 4.96 $\pm$ 0.81 | <b>0.025</b> | 283     | 5.15 $\pm$ 0.90 | 0.592 | 669     | 5.04 $\pm$ 0.86 | 0.419        |
|                                   | 1    | 409       | 4.89 $\pm$ 0.81 |              | 333     | 5.13 $\pm$ 0.91 |       | 742     | 5.00 $\pm$ 0.86 |              |
|                                   | 2    | 107       | 4.72 $\pm$ 0.77 |              | 90      | 5.24 $\pm$ 0.87 |       | 197     | 4.96 $\pm$ 0.85 |              |
| H2                                | 0    | 490       | 4.94 $\pm$ 0.84 | 0.289        | 380     | 5.16 $\pm$ 0.90 | 0.532 | 870     | 5.04 $\pm$ 0.87 | 0.076        |
|                                   | 1    | 346       | 4.82 $\pm$ 0.74 |              | 286     | 5.12 $\pm$ 0.89 |       | 632     | 4.95 $\pm$ 0.82 |              |
|                                   | 2    | 66        | 5.00 $\pm$ 0.87 |              | 40      | 5.28 $\pm$ 1.00 |       | 106     | 5.11 $\pm$ 0.93 |              |
| H3                                | 0    | 670       | 4.85 $\pm$ 0.80 | <b>0.006</b> | 543     | 5.17 $\pm$ 0.92 | 0.336 | 1213    | 4.99 $\pm$ 0.87 | 0.129        |
|                                   | 1    | 217       | 5.02 $\pm$ 0.82 |              | 148     | 5.07 $\pm$ 0.85 |       | 365     | 5.04 $\pm$ 0.83 |              |
|                                   | 2    | 15        | 5.23 $\pm$ 0.93 |              | 15      | 5.34 $\pm$ 0.63 |       | 30      | 5.29 $\pm$ 0.78 |              |
| H4                                | 0    | 681       | 4.90 $\pm$ 0.80 | 0.599        | 530     | 5.15 $\pm$ 0.88 | 0.993 | 1211    | 5.01 $\pm$ 0.85 | 0.819        |
|                                   | 1    | 207       | 4.92 $\pm$ 0.84 |              | 161     | 5.16 $\pm$ 0.95 |       | 368     | 5.03 $\pm$ 0.90 |              |
|                                   | 2    | 14        | 4.70 $\pm$ 0.70 |              | 15      | 5.14 $\pm$ 0.91 |       | 29      | 4.93 $\pm$ 0.83 |              |
| H5                                | 0    | 727       | 4.88 $\pm$ 0.81 | 0.173        | 568     | 5.16 $\pm$ 0.89 | 0.757 | 1295    | 5.00 $\pm$ 0.86 | 0.442        |
|                                   | 1    | 165       | 4.95 $\pm$ 0.78 |              | 135     | 5.10 $\pm$ 0.92 |       | 300     | 5.02 $\pm$ 0.85 |              |
|                                   | 2    | 10        | 5.31 $\pm$ 0.86 |              | 3       | 5.30 $\pm$ 1.00 |       | 13      | 5.31 $\pm$ 0.84 |              |
| <b>LDL cholesterol (mmol/L)</b>   |      |           |                 |              |         |                 |       |         |                 |              |
| H1                                | 0    | 386       | 3.01 $\pm$ 0.69 | <b>0.01</b>  | 283     | 3.28 $\pm$ 0.79 | 0.651 | 669     | 3.12 $\pm$ 0.74 | 0.256        |
|                                   | 1    | 409       | 2.91 $\pm$ 0.72 |              | 333     | 3.25 $\pm$ 0.81 |       | 742     | 3.06 $\pm$ 0.78 |              |
|                                   | 2    | 107       | 2.79 $\pm$ 0.64 |              | 90      | 3.34 $\pm$ 0.76 |       | 197     | 3.04 $\pm$ 0.74 |              |
| H2                                | 0    | 490       | 2.97 $\pm$ 0.72 | 0.106        | 380     | 3.29 $\pm$ 0.80 | 0.611 | 870     | 3.11 $\pm$ 0.77 | 0.163        |
|                                   | 1    | 346       | 2.88 $\pm$ 0.63 |              | 286     | 3.24 $\pm$ 0.79 |       | 632     | 3.04 $\pm$ 0.73 |              |
|                                   | 2    | 66        | 3.00 $\pm$ 0.82 |              | 40      | 3.33 $\pm$ 0.84 |       | 106     | 3.13 $\pm$ 0.84 |              |
| H3                                | 0    | 670       | 2.89 $\pm$ 0.68 | <b>0.003</b> | 543     | 3.28 $\pm$ 0.80 | 0.16  | 1213    | 3.07 $\pm$ 0.76 | <b>0.022</b> |
|                                   | 1    | 217       | 3.05 $\pm$ 0.74 |              | 148     | 3.21 $\pm$ 0.78 |       | 365     | 3.12 $\pm$ 0.76 |              |
|                                   | 2    | 15        | 3.26 $\pm$ 0.75 |              | 15      | 3.60 $\pm$ 0.64 |       | 30      | 3.43 $\pm$ 0.71 |              |
| H4                                | 0    | 681       | 2.93 $\pm$ 0.70 | 0.748        | 530     | 3.27 $\pm$ 0.79 | 0.979 | 1211    | 3.08 $\pm$ 0.76 | 0.822        |
|                                   | 1    | 207       | 2.97 $\pm$ 0.70 |              | 161     | 3.27 $\pm$ 0.81 |       | 368     | 3.10 $\pm$ 0.76 |              |
|                                   | 2    | 14        | 2.96 $\pm$ 0.61 |              | 15      | 3.31 $\pm$ 0.81 |       | 29      | 3.14 $\pm$ 0.73 |              |
| H5                                | 0    | 727       | 2.93 $\pm$ 0.70 | 0.235        | 568     | 3.28 $\pm$ 0.79 | 0.785 | 1295    | 3.08 $\pm$ 0.76 | 0.569        |
|                                   | 1    | 165       | 2.97 $\pm$ 0.68 |              | 135     | 3.23 $\pm$ 0.80 |       | 300     | 3.09 $\pm$ 0.75 |              |

|                                 |   |     |             |       |     |             |       |      |             |              |
|---------------------------------|---|-----|-------------|-------|-----|-------------|-------|------|-------------|--------------|
|                                 | 2 | 10  | 3.28 ± 0.55 |       | 3   | 3.39 ± 0.89 |       | 13   | 3.31 ± 0.60 |              |
| <b>HDL cholesterol (mmol/L)</b> |   |     |             |       |     |             |       |      |             |              |
| H1                              | 0 | 386 | 1.44 ± 0.31 | 0.237 | 283 | 1.23 ± 0.29 | 0.385 | 669  | 1.35 ± 0.32 | 0.59         |
|                                 | 1 | 409 | 1.46 ± 0.30 |       | 333 | 1.20 ± 0.28 |       | 742  | 1.35 ± 0.32 |              |
|                                 | 2 | 107 | 1.41 ± 0.35 |       | 90  | 1.23 ± 0.25 |       | 197  | 1.33 ± 0.32 |              |
| H2                              | 0 | 490 | 1.45 ± 0.32 | 0.144 | 380 | 1.22 ± 0.27 | 0.395 | 870  | 1.35 ± 0.32 | <b>0.023</b> |
|                                 | 1 | 346 | 1.43 ± 0.29 |       | 286 | 1.20 ± 0.28 |       | 632  | 1.33 ± 0.30 |              |
|                                 | 2 | 66  | 1.51 ± 0.35 |       | 40  | 1.26 ± 0.36 |       | 106  | 1.42 ± 0.37 |              |
| H3                              | 0 | 670 | 1.44 ± 0.31 | 0.562 | 543 | 1.23 ± 0.28 | 0.409 | 1213 | 1.34 ± 0.32 | 0.758        |
|                                 | 1 | 217 | 1.47 ± 0.32 |       | 148 | 1.19 ± 0.27 |       | 365  | 1.35 ± 0.33 |              |
|                                 | 2 | 15  | 1.44 ± 0.30 |       | 15  | 1.19 ± 0.25 |       | 30   | 1.32 ± 0.30 |              |
| H4                              | 0 | 681 | 1.46 ± 0.32 | 0.057 | 530 | 1.21 ± 0.28 | 0.474 | 1211 | 1.35 ± 0.32 | 0.326        |
|                                 | 1 | 207 | 1.42 ± 0.30 |       | 161 | 1.24 ± 0.28 |       | 368  | 1.34 ± 0.30 |              |
|                                 | 2 | 14  | 1.30 ± 0.26 |       | 15  | 1.23 ± 0.23 |       | 29   | 1.26 ± 0.24 |              |
| H5                              | 0 | 727 | 1.44 ± 0.31 | 0.819 | 568 | 1.21 ± 0.27 | 0.44  | 1295 | 1.34 ± 0.32 | 0.447        |
|                                 | 1 | 165 | 1.46 ± 0.29 |       | 135 | 1.24 ± 0.31 |       | 300  | 1.36 ± 0.32 |              |
|                                 | 2 | 10  | 1.45 ± 0.36 |       | 3   | 1.34 ± 0.25 |       | 13   | 1.42 ± 0.33 |              |
| <b>Triglycerides (mmol/L)</b>   |   |     |             |       |     |             |       |      |             |              |
| H1                              | 0 | 386 | 1.14 ± 0.53 | 0.895 | 283 | 1.42 ± 0.68 | 0.428 | 669  | 1.26 ± 0.61 | 0.364        |
|                                 | 1 | 409 | 1.14 ± 0.58 |       | 333 | 1.50 ± 0.74 |       | 742  | 1.30 ± 0.68 |              |
|                                 | 2 | 107 | 1.16 ± 0.56 |       | 90  | 1.49 ± 0.69 |       | 197  | 1.31 ± 0.64 |              |
| H2                              | 0 | 490 | 1.16 ± 0.59 | 0.646 | 380 | 1.44 ± 0.69 | 0.531 | 870  | 1.28 ± 0.65 | 0.726        |
|                                 | 1 | 346 | 1.13 ± 0.53 |       | 286 | 1.50 ± 0.73 |       | 632  | 1.30 ± 0.65 |              |
|                                 | 2 | 66  | 1.09 ± 0.39 |       | 40  | 1.51 ± 0.76 |       | 106  | 1.25 ± 0.59 |              |
| H3                              | 0 | 670 | 1.15 ± 0.56 | 0.867 | 543 | 1.47 ± 0.70 | 0.34  | 1213 | 1.29 ± 0.65 | 0.555        |
|                                 | 1 | 217 | 1.13 ± 0.55 |       | 148 | 1.48 ± 0.75 |       | 365  | 1.27 ± 0.66 |              |
|                                 | 2 | 15  | 1.16 ± 0.40 |       | 15  | 1.20 ± 0.47 |       | 30   | 1.18 ± 0.43 |              |
| H4                              | 0 | 681 | 1.13 ± 0.53 | 0.262 | 530 | 1.48 ± 0.72 | 0.626 | 1211 | 1.28 ± 0.64 | 0.548        |
|                                 | 1 | 207 | 1.19 ± 0.65 |       | 161 | 1.44 ± 0.69 |       | 368  | 1.30 ± 0.68 |              |
|                                 | 2 | 14  | 0.98 ± 0.36 |       | 15  | 1.33 ± 0.47 |       | 29   | 1.16 ± 0.45 |              |
| H5                              | 0 | 727 | 1.14 ± 0.55 | 0.638 | 568 | 1.48 ± 0.71 | 0.404 | 1295 | 1.29 ± 0.65 | 0.838        |
|                                 | 1 | 165 | 1.16 ± 0.58 |       | 135 | 1.40 ± 0.70 |       | 300  | 1.27 ± 0.65 |              |
|                                 | 2 | 10  | 1.30 ± 0.74 |       | 3   | 1.26 ± 0.64 |       | 13   | 1.29 ± 0.69 |              |
| <b>Apolipoprotein B (g/L)</b>   |   |     |             |       |     |             |       |      |             |              |

|    |   |     |                 |       |     |                 |       |      |                 |       |
|----|---|-----|-----------------|-------|-----|-----------------|-------|------|-----------------|-------|
| H1 | 0 | 386 | $0.95 \pm 0.23$ | 0.069 | 283 | $1.09 \pm 0.25$ | 0.701 | 669  | $1.01 \pm 0.25$ | 0.78  |
|    | 1 | 409 | $0.93 \pm 0.22$ |       | 333 | $1.09 \pm 0.25$ |       | 742  | $1.00 \pm 0.25$ |       |
|    | 2 | 107 | $0.91 \pm 0.20$ |       | 90  | $1.11 \pm 0.23$ |       | 197  | $1.00 \pm 0.24$ |       |
| H2 | 0 | 490 | $0.95 \pm 0.23$ | 0.311 | 380 | $1.09 \pm 0.24$ | 0.661 | 870  | $1.01 \pm 0.24$ | 0.741 |
|    | 1 | 346 | $0.92 \pm 0.21$ |       | 286 | $1.09 \pm 0.25$ |       | 632  | $1.00 \pm 0.25$ |       |
|    | 2 | 66  | $0.94 \pm 0.24$ |       | 40  | $1.13 \pm 0.28$ |       | 106  | $1.01 \pm 0.27$ |       |
| H3 | 0 | 670 | $0.93 \pm 0.22$ | 0.055 | 543 | $1.10 \pm 0.25$ | 0.621 | 1213 | $1.00 \pm 0.25$ | 0.421 |
|    | 1 | 217 | $0.96 \pm 0.23$ |       | 148 | $1.08 \pm 0.23$ |       | 365  | $1.00 \pm 0.24$ |       |
|    | 2 | 15  | $1.03 \pm 0.23$ |       | 15  | $1.09 \pm 0.19$ |       | 30   | $1.06 \pm 0.21$ |       |
| H4 | 0 | 681 | $0.93 \pm 0.22$ | 0.465 | 530 | $1.10 \pm 0.24$ | 0.872 | 1211 | $1.00 \pm 0.24$ | 0.873 |
|    | 1 | 207 | $0.95 \pm 0.24$ |       | 161 | $1.09 \pm 0.26$ |       | 368  | $1.01 \pm 0.25$ |       |
|    | 2 | 14  | $0.93 \pm 0.19$ |       | 15  | $1.08 \pm 0.27$ |       | 29   | $1.01 \pm 0.24$ |       |
| H5 | 0 | 727 | $0.93 \pm 0.22$ | 0.248 | 568 | $1.10 \pm 0.25$ | 0.612 | 1295 | $1.00 \pm 0.25$ | 0.747 |
|    | 1 | 165 | $0.94 \pm 0.22$ |       | 135 | $1.07 \pm 0.24$ |       | 300  | $1.00 \pm 0.24$ |       |
|    | 2 | 10  | $1.04 \pm 0.24$ |       | 3   | $1.10 \pm 0.35$ |       | 13   | $1.06 \pm 0.25$ |       |



Supplementary Table 6. The association of *USF1* rs2516839, rs1556259, haplotype 3 and serum lipoprotein subclass cholesterol fractions (total cholesterol, cholesterol ester, and free cholesterol when available) and total lipid concentrations in 2007 measured by <sup>1</sup>H-NMR spectroscopy in women (The Cardiovascular Risk in Young Finns Study)

|                                   | rs2516839 |           |           |              | rs1556259 |           |           |                  | Haplotype 3 |           |           |                  |
|-----------------------------------|-----------|-----------|-----------|--------------|-----------|-----------|-----------|------------------|-------------|-----------|-----------|------------------|
|                                   | TT<br>349 | TC<br>419 | CC<br>123 | P            | AA<br>665 | AG<br>218 | GG<br>12  | P                | 0<br>670    | 1<br>217  | 2<br>15   | P                |
| <b>Total cholesterol (mmol/L)</b> |           |           |           |              |           |           |           |                  |             |           |           |                  |
| L_VLDL                            | 0.03±0.03 | 0.04±0.03 | 0.04±0.04 | 0.332        | 0.04±0.04 | 0.04±0.04 | 0.04±0.02 | 0.95             | 0.04±0.04   | 0.04±0.04 | 0.03±0.02 | 0.897            |
| M_VLDL                            | 0.13±0.06 | 0.13±0.06 | 0.14±0.07 | 0.177        | 0.13±0.06 | 0.13±0.07 | 0.16±0.06 | 0.484            | 0.13±0.06   | 0.13±0.07 | 0.15±0.06 | 0.658            |
| S_VLDL                            | 0.21±0.07 | 0.21±0.08 | 0.23±0.08 | <b>0.008</b> | 0.21±0.08 | 0.22±0.08 | 0.27±0.10 | <b>0.014</b>     | 0.21±0.08   | 0.22±0.08 | 0.26±0.10 | <b>0.013</b>     |
| L_LDL                             | 0.96±0.25 | 0.99±0.25 | 1.05±0.26 | <b>0.001</b> | 0.97±0.25 | 1.03±0.26 | 1.18±0.32 | <b>&lt;0.001</b> | 0.97±0.25   | 1.03±0.26 | 1.19±0.35 | <b>&lt;0.001</b> |
| M_LDL                             | 0.54±0.16 | 0.57±0.16 | 0.61±0.17 | <b>0.001</b> | 0.55±0.16 | 0.59±0.17 | 0.68±0.19 | <b>0.001</b>     | 0.55±0.16   | 0.59±0.17 | 0.69±0.22 | <b>&lt;0.001</b> |
| S_LDL                             | 0.33±0.10 | 0.34±0.10 | 0.37±0.11 | <b>0.001</b> | 0.33±0.10 | 0.35±0.11 | 0.40±0.11 | <b>0.002</b>     | 0.33±0.10   | 0.35±0.11 | 0.40±0.13 | <b>0.001</b>     |
| XL_HDL                            | 0.20±0.11 | 0.21±0.11 | 0.18±0.10 | <b>0.037</b> | 0.20±0.11 | 0.21±0.11 | 0.15±0.08 | 0.195            | 0.20±0.11   | 0.21±0.11 | 0.16±0.08 | 0.251            |
| L_HDL                             | 0.48±0.23 | 0.50±0.22 | 0.44±0.21 | <b>0.036</b> | 0.48±0.22 | 0.50±0.23 | 0.43±0.23 | 0.477            | 0.48±0.22   | 0.49±0.23 | 0.47±0.22 | 0.674            |
| M_HDL                             | 0.55±0.13 | 0.57±0.15 | 0.56±0.14 | 0.345        | 0.56±0.14 | 0.57±0.15 | 0.57±0.19 | 0.545            | 0.56±0.14   | 0.57±0.15 | 0.59±0.19 | 0.343            |
| <b>Free cholesterol (mmol/L)</b>  |           |           |           |              |           |           |           |                  |             |           |           |                  |
| L_VLDL                            | 0.02±0.02 | 0.02±0.02 | 0.02±0.02 | 0.268        | 0.02±0.02 | 0.02±0.02 | 0.02±0.01 | 0.975            | 0.02±0.02   | 0.02±0.02 | 0.02±0.01 | 0.956            |
| M_VLDL                            | 0.05±0.03 | 0.05±0.03 | 0.06±0.03 | 0.224        | 0.05±0.03 | 0.05±0.03 | 0.06±0.03 | 0.671            | 0.05±0.03   | 0.05±0.03 | 0.06±0.02 | 0.832            |
| S_VLDL                            | 0.08±0.03 | 0.08±0.03 | 0.09±0.03 | <b>0.022</b> | 0.08±0.03 | 0.08±0.03 | 0.10±0.04 | 0.052            | 0.08±0.03   | 0.08±0.03 | 0.10±0.03 | 0.064            |
| IDL                               | 0.22±0.06 | 0.23±0.05 | 0.24±0.06 | <b>0.008</b> | 0.23±0.05 | 0.24±0.05 | 0.27±0.07 | <b>0.001</b>     | 0.23±0.05   | 0.24±0.05 | 0.27±0.07 | <b>&lt;0.001</b> |
| L_LDL                             | 0.27±0.06 | 0.28±0.06 | 0.29±0.07 | <b>0.003</b> | 0.27±0.06 | 0.29±0.06 | 0.32±0.08 | <b>0.001</b>     | 0.27±0.06   | 0.29±0.06 | 0.33±0.08 | <b>&lt;0.001</b> |
| XL_HDL                            | 0.06±0.03 | 0.06±0.03 | 0.05±0.03 | <b>0.038</b> | 0.06±0.03 | 0.06±0.03 | 0.05±0.03 | 0.303            | 0.06±0.03   | 0.06±0.03 | 0.05±0.03 | 0.396            |
| L_HDL                             | 0.11±0.05 | 0.11±0.05 | 0.10±0.05 | <b>0.041</b> | 0.10±0.05 | 0.11±0.05 | 0.10±0.06 | 0.601            | 0.10±0.05   | 0.11±0.05 | 0.11±0.05 | 0.794            |
| M_HDL                             | 0.11±0.03 | 0.11±0.03 | 0.11±0.03 | 0.291        | 0.11±0.03 | 0.11±0.03 | 0.11±0.04 | 0.43             | 0.11±0.03   | 0.11±0.03 | 0.12±0.04 | 0.179            |
| <b>Cholesterol ester (mmol/L)</b> |           |           |           |              |           |           |           |                  |             |           |           |                  |
| L_VLDL                            | 0.02±0.02 | 0.02±0.02 | 0.02±0.02 | 0.391        | 0.02±0.02 | 0.02±0.02 | 0.02±0.01 | 0.915            | 0.02±0.02   | 0.02±0.02 | 0.02±0.01 | 0.84             |
| M_VLDL                            | 0.08±0.03 | 0.08±0.03 | 0.08±0.04 | 0.161        | 0.08±0.03 | 0.08±0.03 | 0.09±0.03 | 0.307            | 0.08±0.03   | 0.08±0.03 | 0.09±0.03 | 0.444            |
| L_LDL                             | 0.69±0.19 | 0.71±0.19 | 0.76±0.20 | <b>0.001</b> | 0.70±0.19 | 0.74±0.20 | 0.86±0.24 | <b>&lt;0.001</b> | 0.70±0.19   | 0.74±0.20 | 0.86±0.26 | <b>&lt;0.001</b> |
| M_LDL                             | 0.39±0.13 | 0.41±0.13 | 0.45±0.13 | <b>0.001</b> | 0.40±0.13 | 0.43±0.13 | 0.50±0.15 | <b>0.001</b>     | 0.40±0.13   | 0.43±0.13 | 0.51±0.17 | <b>&lt;0.001</b> |
| XL_HDL                            | 0.15±0.08 | 0.15±0.08 | 0.13±0.07 | <b>0.035</b> | 0.14±0.08 | 0.15±0.07 | 0.11±0.05 | 0.195            | 0.14±0.08   | 0.15±0.07 | 0.12±0.05 | 0.233            |
| L_HDL                             | 0.38±0.18 | 0.39±0.17 | 0.34±0.16 | <b>0.035</b> | 0.37±0.17 | 0.39±0.18 | 0.34±0.18 | 0.441            | 0.37±0.17   | 0.39±0.18 | 0.36±0.17 | 0.628            |
| M_HDL                             | 0.45±0.11 | 0.46±0.12 | 0.46±0.11 | 0.361        | 0.45±0.11 | 0.46±0.12 | 0.46±0.15 | 0.558            | 0.45±0.11   | 0.46±0.12 | 0.48±0.15 | 0.38             |
| <b>Total lipids (mmol/L)</b>      |           |           |           |              |           |           |           |                  |             |           |           |                  |

|          |           |           |           |              |           |           |           |              |           |           |           |                  |
|----------|-----------|-----------|-----------|--------------|-----------|-----------|-----------|--------------|-----------|-----------|-----------|------------------|
| XXL_VLDL | 0.01±0.02 | 0.01±0.02 | 0.01±0.02 | 0.505        | 0.01±0.02 | 0.01±0.02 | 0.01±0.01 | 0.874        | 0.01±0.02 | 0.01±0.02 | 0.01±0.01 | 0.689            |
| XL_VLDL  | 0.03±0.04 | 0.04±0.04 | 0.04±0.05 | 0.242        | 0.04±0.05 | 0.04±0.05 | 0.03±0.03 | 0.961        | 0.04±0.05 | 0.04±0.05 | 0.03±0.03 | 0.795            |
| L_VLDL   | 0.17±0.16 | 0.17±0.16 | 0.19±0.19 | 0.335        | 0.17±0.17 | 0.17±0.17 | 0.17±0.10 | 0.891        | 0.17±0.17 | 0.17±0.17 | 0.17±0.10 | 0.836            |
| M_VLDL   | 0.43±0.24 | 0.44±0.25 | 0.48±0.28 | 0.257        | 0.44±0.25 | 0.44±0.26 | 0.50±0.18 | 0.706        | 0.44±0.25 | 0.44±0.26 | 0.50±0.18 | 0.842            |
| S_VLDL   | 0.52±0.19 | 0.54±0.20 | 0.58±0.21 | <b>0.041</b> | 0.53±0.20 | 0.54±0.21 | 0.65±0.22 | 0.127        | 0.53±0.20 | 0.54±0.21 | 0.65±0.22 | 0.163            |
| XS_VLDL  | 0.51±0.14 | 0.53±0.15 | 0.54±0.14 | 0.109        | 0.52±0.14 | 0.53±0.14 | 0.62±0.17 | <b>0.022</b> | 0.52±0.14 | 0.53±0.14 | 0.62±0.17 | <b>0.032</b>     |
| IDL      | 1.20±0.28 | 1.24±0.28 | 1.28±0.28 | <b>0.011</b> | 1.21±0.28 | 1.26±0.28 | 1.44±0.35 | <b>0.001</b> | 1.21±0.28 | 1.26±0.28 | 1.44±0.35 | <b>0.001</b>     |
| L_LDL    | 1.42±0.36 | 1.47±0.35 | 1.55±0.37 | <b>0.002</b> | 1.44±0.35 | 1.51±0.36 | 1.73±0.44 | <b>0.001</b> | 1.44±0.35 | 1.51±0.36 | 1.73±0.44 | <b>&lt;0.001</b> |
| M_LDL    | 0.81±0.22 | 0.84±0.22 | 0.89±0.23 | <b>0.001</b> | 0.82±0.22 | 0.87±0.23 | 0.99±0.26 | <b>0.002</b> | 0.82±0.22 | 0.87±0.23 | 0.99±0.26 | <b>&lt;0.001</b> |
| S_LDL    | 0.51±0.14 | 0.53±0.14 | 0.56±0.16 | <b>0.001</b> | 0.52±0.14 | 0.55±0.15 | 0.61±0.15 | <b>0.004</b> | 0.52±0.14 | 0.55±0.15 | 0.61±0.15 | <b>0.001</b>     |
| XL_HDL   | 0.48±0.25 | 0.48±0.24 | 0.41±0.21 | <b>0.022</b> | 0.47±0.25 | 0.48±0.24 | 0.38±0.19 | 0.369        | 0.47±0.25 | 0.48±0.24 | 0.38±0.19 | 0.571            |
| L_HDL    | 1.02±0.42 | 1.05±0.40 | 0.94±0.40 | <b>0.049</b> | 1.02±0.40 | 1.04±0.43 | 0.97±0.45 | 0.64         | 1.02±0.40 | 1.04±0.43 | 0.97±0.45 | 0.737            |
| M_HDL    | 1.09±0.24 | 1.12±0.26 | 1.11±0.25 | 0.41         | 1.10±0.25 | 1.12±0.26 | 1.14±0.33 | 0.658        | 1.10±0.25 | 1.12±0.26 | 1.14±0.33 | 0.37             |
| S_HDL    | 1.20±0.15 | 1.22±0.16 | 1.25±0.15 | <b>0.013</b> | 1.21±0.16 | 1.22±0.15 | 1.28±0.19 | 0.187        | 1.21±0.16 | 1.22±0.15 | 1.28±0.19 | <b>0.033</b>     |

Supplementary Table 7. The association of *USFI* rs2516839, rs1556259, haplotype 3 and serum lipoprotein subclass cholesterol fractions (total cholesterol, cholesterol ester, and free cholesterol when available) and total lipid concentrations in 2001 measured by <sup>1</sup>H-NMR spectroscopy in women (The Cardiovascular Risk in Young Finns Study)

|                            | rs2516839 |           |           |       | rs1556259 |           |           |              | Haplotype 3 |           |           |              |
|----------------------------|-----------|-----------|-----------|-------|-----------|-----------|-----------|--------------|-------------|-----------|-----------|--------------|
|                            | TT<br>349 | TC<br>419 | CC<br>123 | P     | AA<br>665 | AG<br>218 | GG<br>12  | P            | 0<br>670    | 1<br>217  | 2<br>15   | P            |
| Total cholesterol (mmol/L) |           |           |           |       |           |           |           |              |             |           |           |              |
| L_VLDL                     | 0.04±0.04 | 0.04±0.04 | 0.04±0.04 | 0.91  | 0.04±0.04 | 0.04±0.03 | 0.02±0.02 | 0.338        | 0.04±0.04   | 0.04±0.03 | 0.03±0.02 | 0.498        |
| M_VLDL                     | 0.13±0.07 | 0.13±0.07 | 0.14±0.07 | 0.647 | 0.13±0.07 | 0.13±0.07 | 0.12±0.05 | 0.856        | 0.13±0.07   | 0.13±0.07 | 0.13±0.05 | 0.922        |
| S_VLDL                     | 0.21±0.08 | 0.22±0.09 | 0.22±0.08 | 0.164 | 0.21±0.08 | 0.22±0.09 | 0.22±0.08 | 0.608        | 0.21±0.08   | 0.22±0.09 | 0.23±0.07 | 0.402        |
| L_LDL                      | 0.96±0.26 | 0.99±0.27 | 1.00±0.27 | 0.171 | 0.96±0.26 | 1.01±0.28 | 1.14±0.29 | <b>0.009</b> | 0.96±0.26   | 1.01±0.28 | 1.11±0.29 | <b>0.008</b> |
| M_LDL                      | 0.56±0.16 | 0.57±0.17 | 0.58±0.17 | 0.267 | 0.56±0.16 | 0.59±0.18 | 0.66±0.17 | <b>0.013</b> | 0.56±0.16   | 0.59±0.18 | 0.65±0.17 | <b>0.012</b> |
| S_LDL                      | 0.33±0.10 | 0.34±0.10 | 0.35±0.10 | 0.364 | 0.34±0.10 | 0.35±0.11 | 0.39±0.10 | <b>0.031</b> | 0.34±0.10   | 0.35±0.11 | 0.39±0.10 | <b>0.026</b> |
| XL_HDL                     | 0.20±0.11 | 0.20±0.11 | 0.19±0.11 | 0.628 | 0.19±0.11 | 0.21±0.11 | 0.20±0.09 | 0.462        | 0.19±0.11   | 0.21±0.11 | 0.20±0.08 | 0.458        |
| L_HDL                      | 0.46±0.21 | 0.47±0.20 | 0.44±0.22 | 0.342 | 0.46±0.21 | 0.48±0.21 | 0.42±0.18 | 0.211        | 0.46±0.21   | 0.48±0.21 | 0.42±0.17 | 0.228        |
| M_HDL                      | 0.54±0.12 | 0.56±0.15 | 0.55±0.14 | 0.527 | 0.55±0.13 | 0.56±0.16 | 0.52±0.11 | 0.425        | 0.55±0.13   | 0.56±0.16 | 0.53±0.12 | 0.433        |
| Free cholesterol (mmol/L)  |           |           |           |       |           |           |           |              |             |           |           |              |
| L_VLDL                     | 0.02±0.02 | 0.02±0.02 | 0.02±0.02 | 0.886 | 0.02±0.02 | 0.02±0.02 | 0.01±0.01 | 0.312        | 0.02±0.02   | 0.02±0.02 | 0.01±0.01 | 0.428        |
| M_VLDL                     | 0.05±0.03 | 0.06±0.03 | 0.06±0.03 | 0.692 | 0.06±0.03 | 0.06±0.03 | 0.05±0.02 | 0.701        | 0.06±0.03   | 0.06±0.03 | 0.05±0.02 | 0.832        |
| S_VLDL                     | 0.08±0.03 | 0.08±0.03 | 0.08±0.03 | 0.184 | 0.08±0.03 | 0.08±0.03 | 0.08±0.03 | 0.765        | 0.08±0.03   | 0.08±0.03 | 0.09±0.03 | 0.589        |
| IDL                        | 0.21±0.05 | 0.22±0.06 | 0.22±0.06 | 0.102 | 0.22±0.06 | 0.23±0.06 | 0.26±0.06 | <b>0.004</b> | 0.22±0.06   | 0.23±0.06 | 0.25±0.06 | <b>0.005</b> |
| L_LDL                      | 0.27±0.06 | 0.27±0.07 | 0.28±0.07 | 0.189 | 0.27±0.06 | 0.28±0.07 | 0.32±0.07 | <b>0.004</b> | 0.27±0.06   | 0.28±0.07 | 0.31±0.07 | <b>0.004</b> |
| XL_HDL                     | 0.06±0.03 | 0.06±0.03 | 0.05±0.03 | 0.585 | 0.06±0.03 | 0.06±0.03 | 0.05±0.03 | 0.294        | 0.06±0.03   | 0.06±0.03 | 0.06±0.02 | 0.323        |
| L_HDL                      | 0.10±0.05 | 0.10±0.05 | 0.09±0.05 | 0.398 | 0.10±0.05 | 0.10±0.05 | 0.09±0.04 | 0.208        | 0.10±0.05   | 0.10±0.05 | 0.09±0.04 | 0.227        |
| M_HDL                      | 0.10±0.02 | 0.11±0.03 | 0.11±0.03 | 0.409 | 0.10±0.03 | 0.11±0.03 | 0.10±0.02 | 0.414        | 0.10±0.03   | 0.11±0.03 | 0.10±0.02 | 0.406        |
| Cholesterol ester (mmol/L) |           |           |           |       |           |           |           |              |             |           |           |              |
| L_VLDL                     | 0.02±0.02 | 0.02±0.02 | 0.02±0.02 | 0.921 | 0.02±0.02 | 0.02±0.02 | 0.01±0.01 | 0.369        | 0.02±0.02   | 0.02±0.02 | 0.01±0.01 | 0.568        |
| M_VLDL                     | 0.08±0.04 | 0.08±0.04 | 0.08±0.03 | 0.619 | 0.08±0.04 | 0.08±0.04 | 0.07±0.03 | 0.901        | 0.08±0.04   | 0.08±0.04 | 0.08±0.03 | 0.868        |
| L_LDL                      | 0.69±0.19 | 0.71±0.20 | 0.72±0.20 | 0.169 | 0.69±0.19 | 0.73±0.21 | 0.82±0.22 | <b>0.013</b> | 0.69±0.19   | 0.73±0.21 | 0.79±0.22 | <b>0.011</b> |
| M_LDL                      | 0.41±0.13 | 0.42±0.13 | 0.42±0.13 | 0.291 | 0.41±0.13 | 0.43±0.14 | 0.49±0.14 | <b>0.016</b> | 0.41±0.13   | 0.43±0.14 | 0.47±0.14 | <b>0.014</b> |
| XL_HDL                     | 0.14±0.08 | 0.14±0.08 | 0.13±0.08 | 0.558 | 0.14±0.08 | 0.15±0.08 | 0.14±0.06 | 0.439        | 0.14±0.08   | 0.15±0.08 | 0.14±0.06 | 0.431        |
| L_HDL                      | 0.36±0.16 | 0.37±0.16 | 0.34±0.18 | 0.323 | 0.36±0.16 | 0.38±0.16 | 0.33±0.14 | 0.211        | 0.36±0.16   | 0.38±0.16 | 0.33±0.13 | 0.228        |
| M_HDL                      | 0.44±0.09 | 0.45±0.12 | 0.45±0.11 | 0.554 | 0.44±0.10 | 0.45±0.13 | 0.42±0.09 | 0.412        | 0.44±0.10   | 0.45±0.13 | 0.42±0.09 | 0.422        |
| Total lipids (mmol/L)      |           |           |           |       |           |           |           |              |             |           |           |              |

|          |           |           |           |       |           |           |           |              |           |           |           |              |
|----------|-----------|-----------|-----------|-------|-----------|-----------|-----------|--------------|-----------|-----------|-----------|--------------|
| XXL_VLDL | 0.01±0.02 | 0.01±0.02 | 0.01±0.02 | 0.943 | 0.01±0.02 | 0.01±0.02 | 0.01±0.01 | 0.39         | 0.01±0.02 | 0.01±0.02 | 0.01±0.01 | 0.416        |
| XL_VLDL  | 0.04±0.05 | 0.04±0.05 | 0.04±0.05 | 0.94  | 0.04±0.05 | 0.03±0.04 | 0.02±0.02 | 0.273        | 0.04±0.05 | 0.04±0.04 | 0.02±0.02 | 0.367        |
| L_VLDL   | 0.19±0.19 | 0.18±0.16 | 0.20±0.18 | 0.779 | 0.19±0.18 | 0.18±0.16 | 0.12±0.08 | 0.384        | 0.19±0.18 | 0.18±0.16 | 0.14±0.18 | 0.499        |
| M_VLDL   | 0.46±0.28 | 0.46±0.24 | 0.48±0.26 | 0.716 | 0.46±0.26 | 0.46±0.25 | 0.41±0.16 | 0.778        | 0.46±0.26 | 0.46±0.25 | 0.43±0.16 | 0.884        |
| S_VLDL   | 0.53±0.22 | 0.55±0.21 | 0.56±0.20 | 0.352 | 0.55±0.21 | 0.55±0.22 | 0.56±0.20 | 0.868        | 0.54±0.21 | 0.56±0.22 | 0.57±0.19 | 0.729        |
| XS_VLDL  | 0.48±0.14 | 0.50±0.15 | 0.50±0.13 | 0.08  | 0.49±0.14 | 0.50±0.15 | 0.56±0.17 | 0.09         | 0.49±0.14 | 0.50±0.15 | 0.55±0.16 | 0.078        |
| IDL      | 1.15±0.28 | 1.19±0.31 | 1.19±0.29 | 0.111 | 1.16±0.28 | 1.21±0.31 | 1.37±0.35 | <b>0.008</b> | 1.16±0.28 | 1.21±0.31 | 1.33±0.34 | <b>0.009</b> |
| L_LDL    | 1.41±0.35 | 1.45±0.38 | 1.47±0.37 | 0.172 | 1.42±0.36 | 1.48±0.39 | 1.67±0.41 | <b>0.008</b> | 1.42±0.36 | 1.49±0.39 | 1.63±0.40 | <b>0.008</b> |
| M_LDL    | 0.82±0.22 | 0.84±0.23 | 0.86±0.23 | 0.245 | 0.83±0.22 | 0.86±0.24 | 0.97±0.24 | <b>0.014</b> | 0.83±0.22 | 0.87±0.24 | 0.95±0.24 | <b>0.013</b> |
| S_LDL    | 0.52±0.15 | 0.53±0.15 | 0.54±0.15 | 0.316 | 0.52±0.15 | 0.54±0.15 | 0.60±0.15 | <b>0.04</b>  | 0.52±0.15 | 0.54±0.15 | 0.59±0.15 | <b>0.036</b> |
| XL_HDL   | 0.45±0.23 | 0.46±0.23 | 0.43±0.24 | 0.558 | 0.45±0.23 | 0.47±0.24 | 0.44±0.20 | 0.369        | 0.45±0.23 | 0.47±0.24 | 0.44±0.18 | 0.412        |
| L_HDL    | 0.97±0.39 | 0.98±0.39 | 0.93±0.41 | 0.417 | 0.96±0.39 | 1.01±0.41 | 0.92±0.32 | 0.64         | 0.96±0.39 | 1.01±0.41 | 0.91±0.31 | 0.257        |
| M_HDL    | 1.07±0.22 | 1.09±0.27 | 1.10±0.26 | 0.524 | 1.08±0.23 | 1.10±0.29 | 1.05±0.18 | 0.658        | 1.08±0.23 | 1.10±0.29 | 1.06±0.21 | 0.54         |
| S_HDL    | 1.23±0.14 | 1.24±0.17 | 1.26±0.17 | 0.19  | 1.23±0.15 | 1.25±0.18 | 1.27±0.13 | 0.187        | 1.23±0.15 | 1.25±0.18 | 1.27±0.15 | 0.313        |

## **Supplementary Methods:**

### **Vascular samples—Tampere Vascular Study**

The atherosclerotic vascular samples used in this study (N=68) were obtained from patients subjected to carotid (N=29) or femoral (N=24) endarterectomy due to symptomatic stenosis or abdominal aortic (N=15) bypass procedure (i.e., aortobifemoral bypass) due to aortoiliac atherosclerosis and the left internal thoracic arteries (LITA, control samples) (N=23) samples were obtained during coronary artery bypass surgery, as part of ongoing Tampere Vascular Study (TVS) {Levula, 2009 #1218; Niinisalo, 2010 #1217; Oksala, 2009 #1185; Oksala, 2010 #1209}. All open vascular surgical procedures were performed at the Division of Vascular Surgery and Heart Center, Tampere University Hospital. The study was approved by the Ethics Committee of Tampere University Hospital, and the study subjects gave their informed consent. The protocols were carried out in accordance with the approved guidelines. The vascular samples were classified according to recommendation of American Heart Association (AHA) {Stryer, 1995 #410}. All the internal mammary arteries that were used as controls were verified to be microscopically healthy.

### **RNA isolation and genome-wide expression analysis**

Endarterectomy samples constituting the intima and inner media from carotid, femoral and aortic regions were obtained. The harvested samples were 5-10 mm x 5-10 mm in size. These fresh tissue samples were immediately soaked in RNALater solution (Ambion Inc., Austin, TX, USA), and RNA was extracted with the Trizol reagent (Invitrogen, Carlsbad, CA, USA) and the RNEasy<sup>®</sup> Kit with RNase-Free DNase Set (Qiagen, Inc, Hilden, Germany). RNA and cRNA quality control was carried out using the Bioanalyzer (Agilent Santa, Clara CA, USA) and quantification was done using Ribogreen (Invitrogen). 300-500ng of RNA was reverse transcribed into cRNA and

biotin-UTP labeled using the Illumina TotalPrep RNA Amplification Kit (Ambion). 1,500 ng of cRNA was hybridized to the Illumina HumanHT-12 v3 Expression BeadChip. The chips were incubated over night, and washing steps and detection were carried out according to manufacturer's instructions.

BeadChips were scanned with the Illumina iScan system. After background subtraction raw intensity data was exported using Illumina GenomeStudio software. Further data processing was conducted using R language and appropriate Bioconductor modules. Robust multiarray averaging (RMA) was used to correct negative intensity values after background subtraction. RMA was the method of choice because it produces differentially expressed genes with highest correlation with qRT-PCR {Schmid, 2010 #1193}. Between arrays normalization was done using robust spline normalization (RSN) which combines the most desired properties of loess and quantile normalizations {Barnes, 2005 #1194}. Quality control was performed using sample clustering and multi dimensional scaling. Outliers were removed due to low expression profiles. Statistical significance was tested using Kruskal–Wallis test. Findings were considered statistically significant at  $P < 0.05$ .

### **DNA extraction and genotyping of the *USF1* polymorphisms**

Briefly, 200ng of DNA was amplified with Multi-Sample Amplification Master Mix (Illumina), enzymatically fragmented, precipitated, resuspended and transferred to the chip. The samples were hybridized to the Beadchip and primers incorporated during hybridization were extended with labeled nucleotides. The hybridized DNA was removed and extended primers were stained. Dried Beadchip was scanned with iScan system. Genotype calling was performed using the standard procedure implemented in GenomeStudio, with the default parameters suggested by the platform manufacturer (Illumina). Genotypes of six SNPs (rs3737787, rs2516838, rs10908821, rs2516839,

rs1556259, rs2774276) were imputed with MACH version 1.0 {Li, 2009 #1195} from genotyped autosomal SNPs, that passed quality control and were present on HapMap.
